# Supplementary material for: Stable and efficient deep-blue terfluorenes functionalized with carbazole dendrons for solution-processed organic light-emitting diodes
Source: Royal Society of Chemistry journal article supplement (doi:10.1039/c5tc01711d), 2015-01-01
Supplement: c5tc01711d1.pdf [file c5tc01711d1.pdf]

## Supporting Information

### **Stable and Efficient Deep-Blue Terfluorenes Functionalized with Carbazole Dendrons for Solution-Processed Organic Light-Emitting Diodes**

Lei Zhao,<sup>†,‡</sup> Shumeng Wang,<sup>†,‡</sup> Shiyang Shao,<sup>†</sup> Junqiao Ding,<sup>\*,†</sup> Lixiang Wang,<sup>\*,†</sup>  
Xiabin Jing,<sup>†</sup> and Fosong Wang<sup>†</sup>

*<sup>†</sup>State Key Laboratory of Polymer Physics and Chemistry, Changchun Institute of Applied Chemistry, Chinese Academy of Sciences, Changchun, 130022, P. R. China*

*<sup>‡</sup>University of Chinese Academy of Sciences, Beijing, 100049, P. R. China*

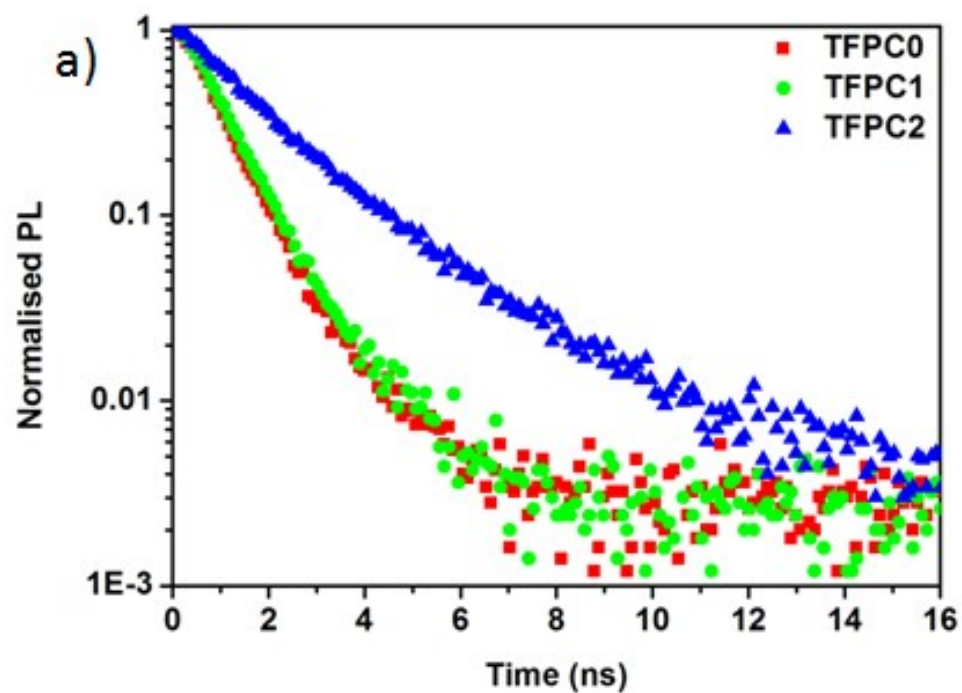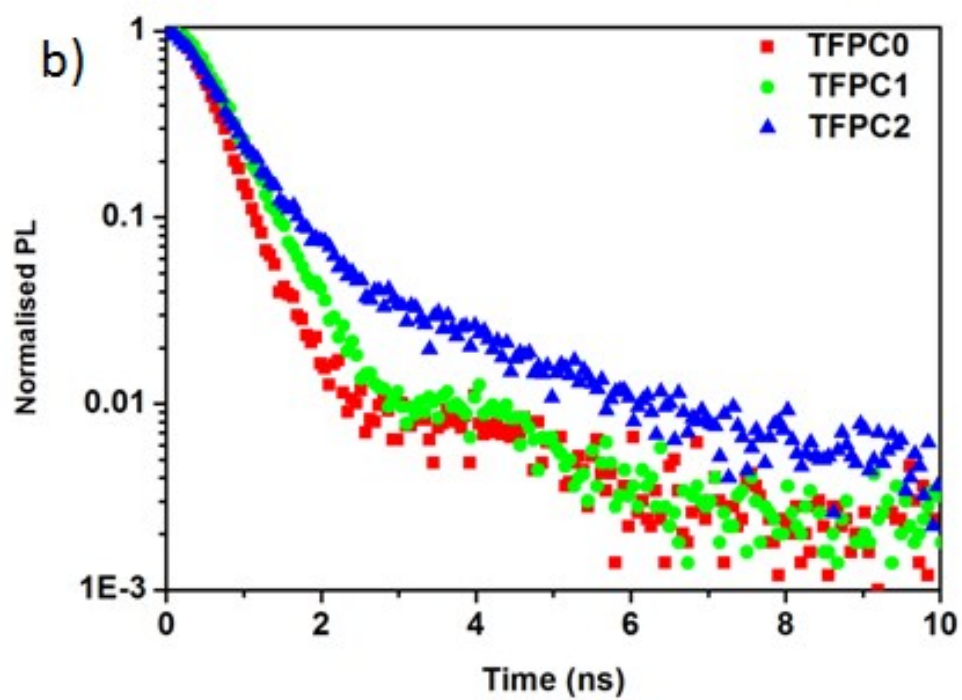

**Figure S1.** Photoluminescence intensity as a function of time for TFPC0~TFPC2 in solution (a) and in film state (b) at room temperature.

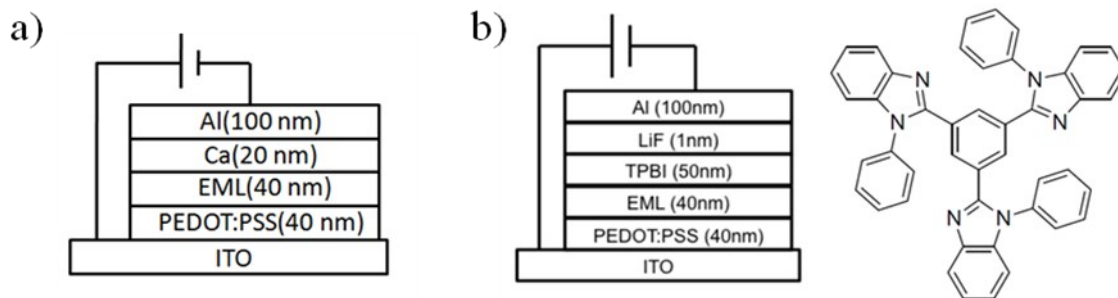

**Figure S2.** The architecture of single-layer (a) and double-layer devices (b).

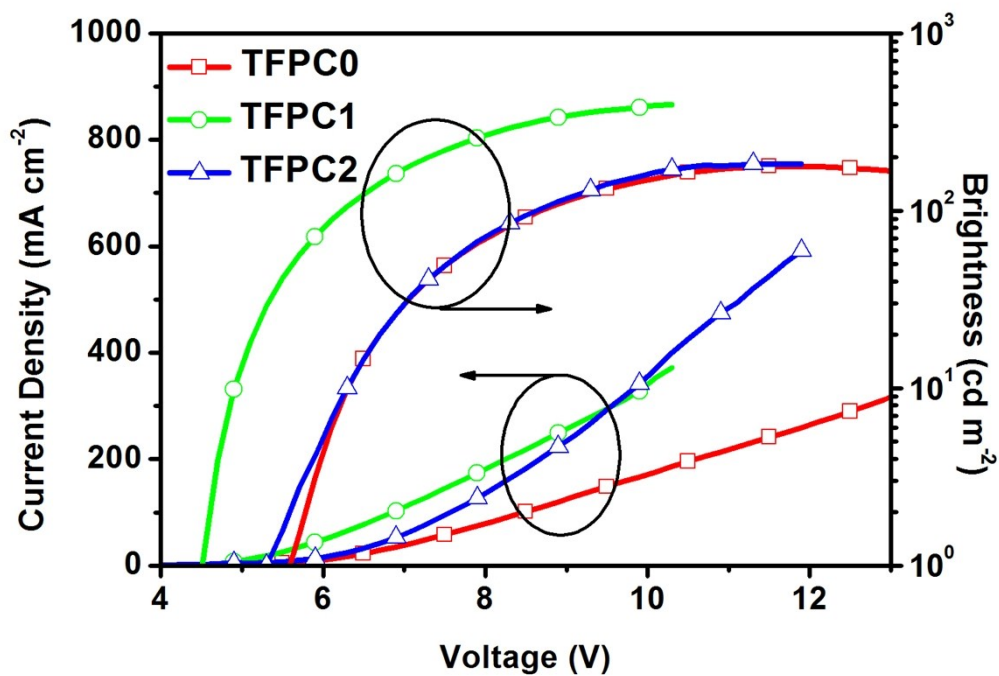

**Figure S3.** The current density-voltage-brightness characteristics of the single-layer devices.

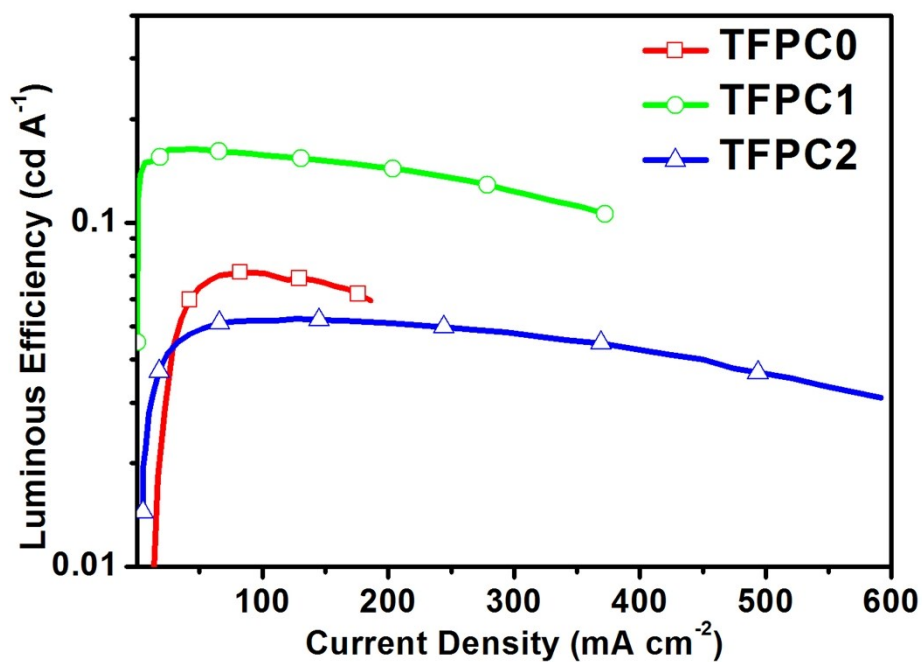

**Figure S4.** The luminous efficiency as a function of current density for the single-layer devices.

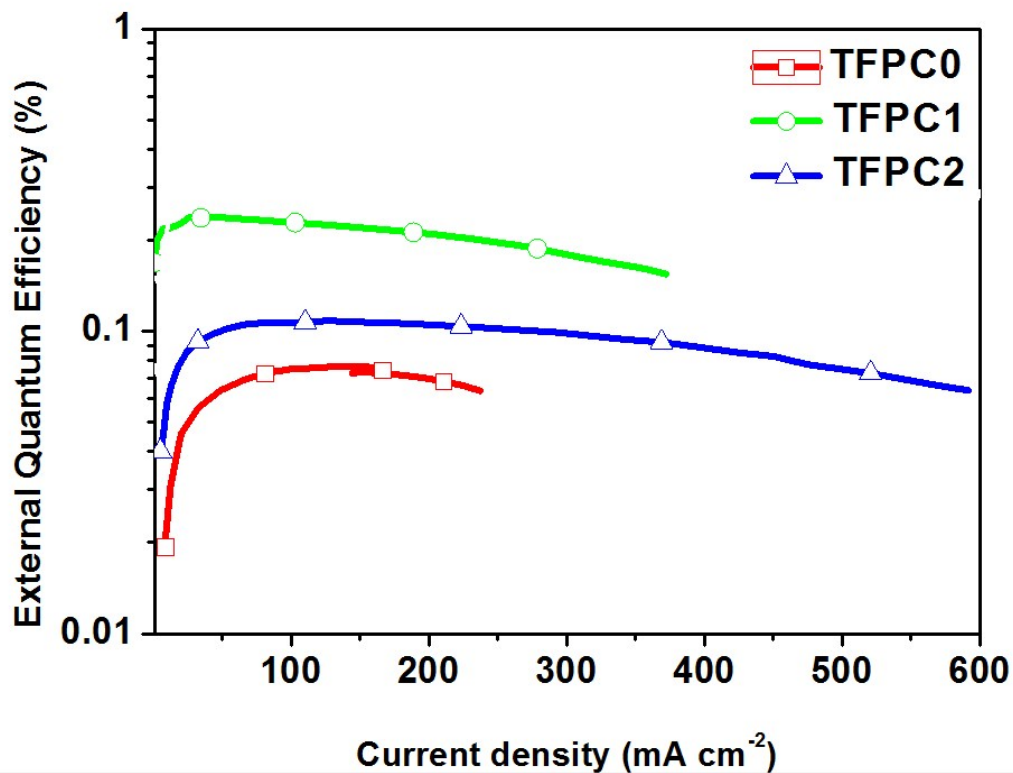

**Figure S5.** The external quantum efficiency as a function of current density for the single-layer devices.

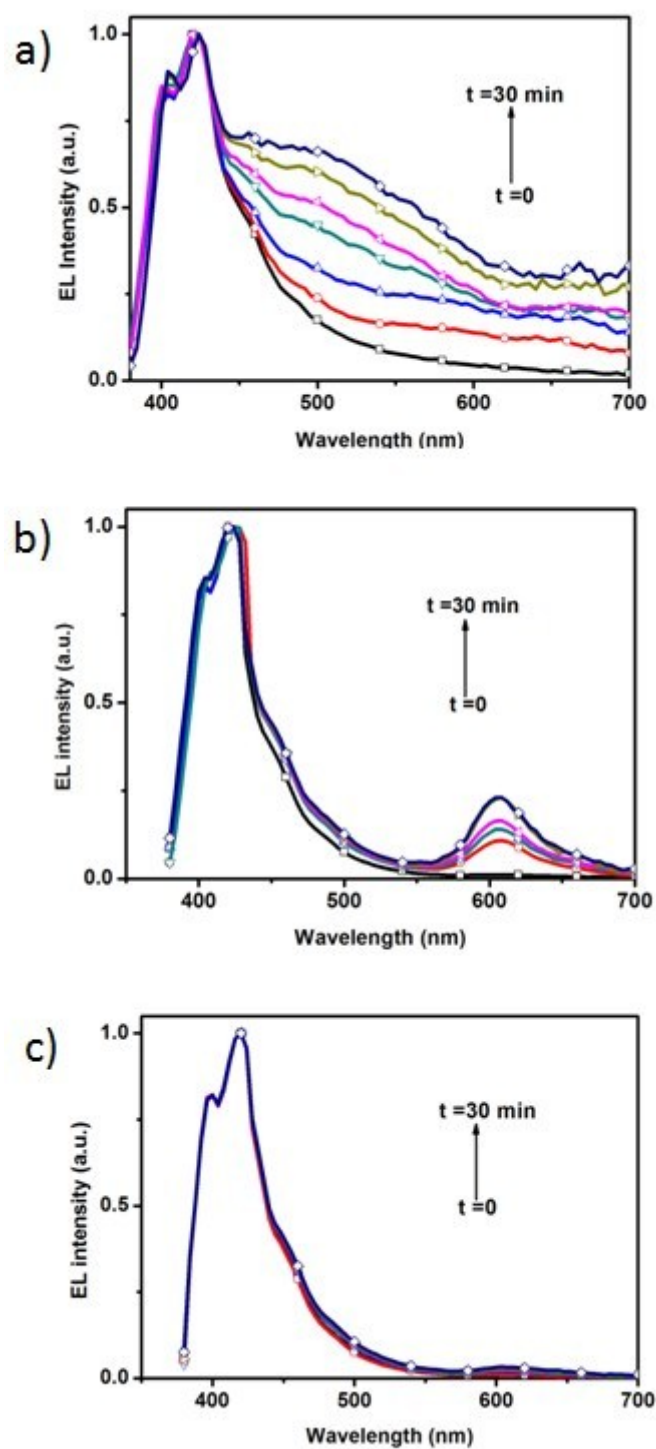

**Figure S6.** The temporal EL spectra of single-layer devices for TFPC0 (a), TFPC1 (b) and TFPC2 (c) driven at a constant current density ( $300 \text{ mA/cm}^2$ ) during 30 minutes. Spectra are recorded every 5 min.

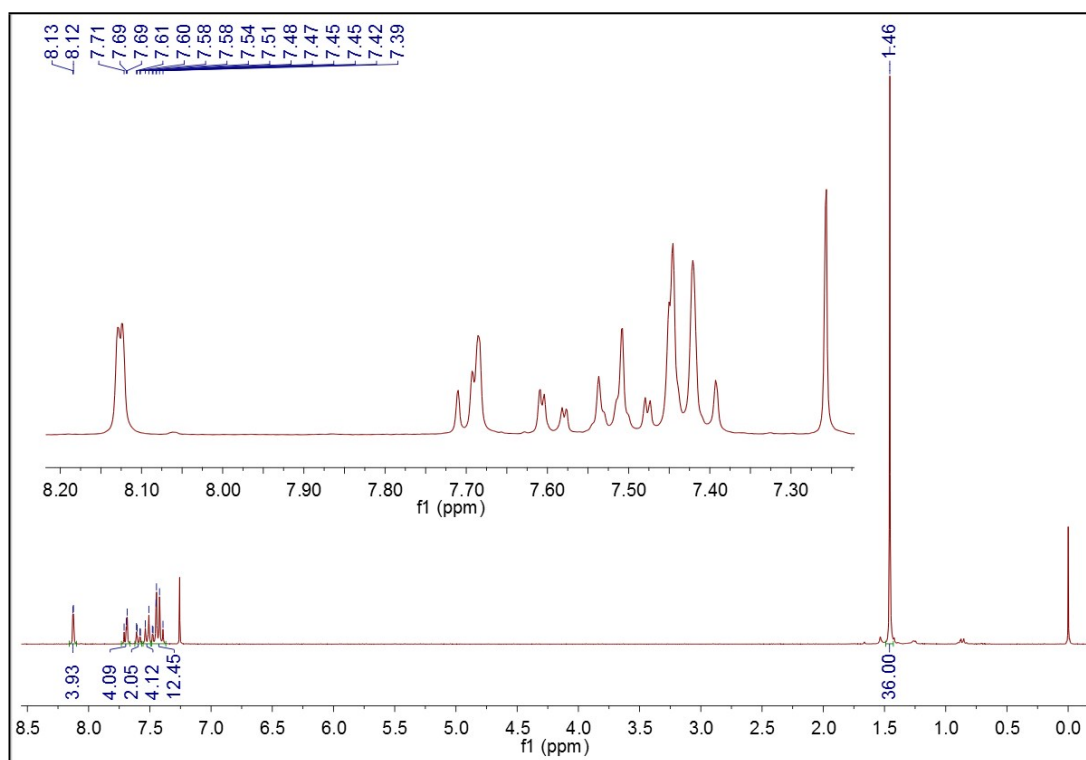

Figure S7.  $^1\text{H}$  NMR spectrum of a1

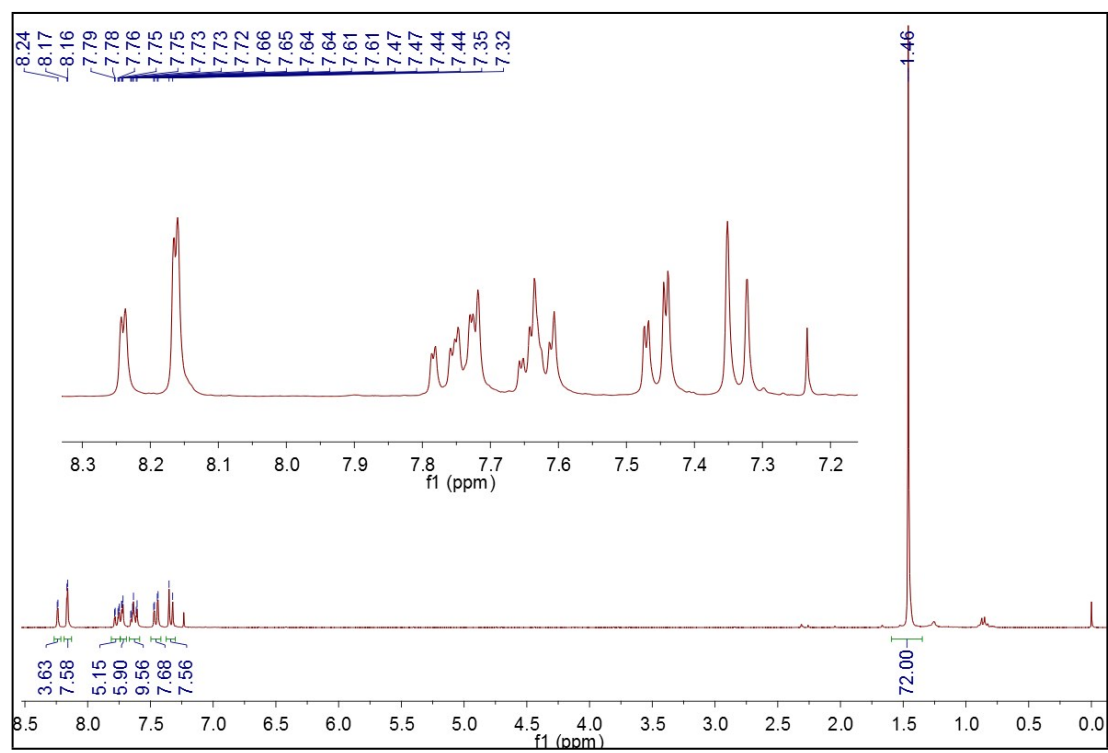

Figure S8.  $^1\text{H}$  NMR spectrum of a2.

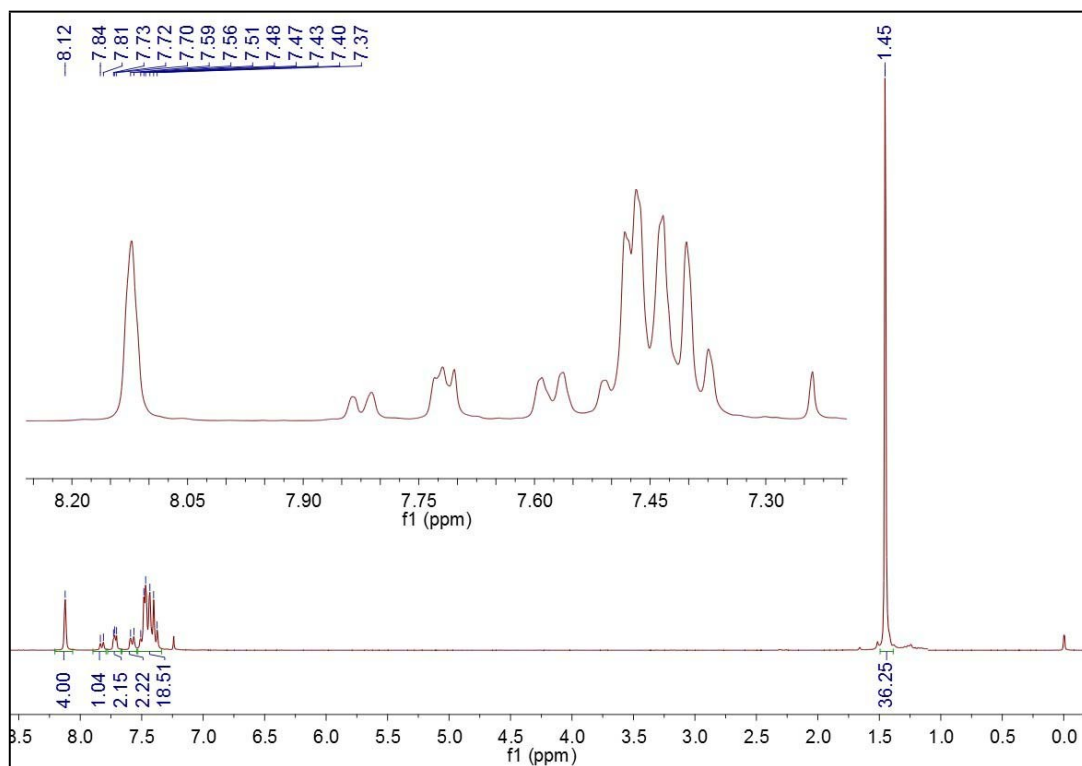

Figure S9.  $^1\text{H}$  NMR spectrum of b1

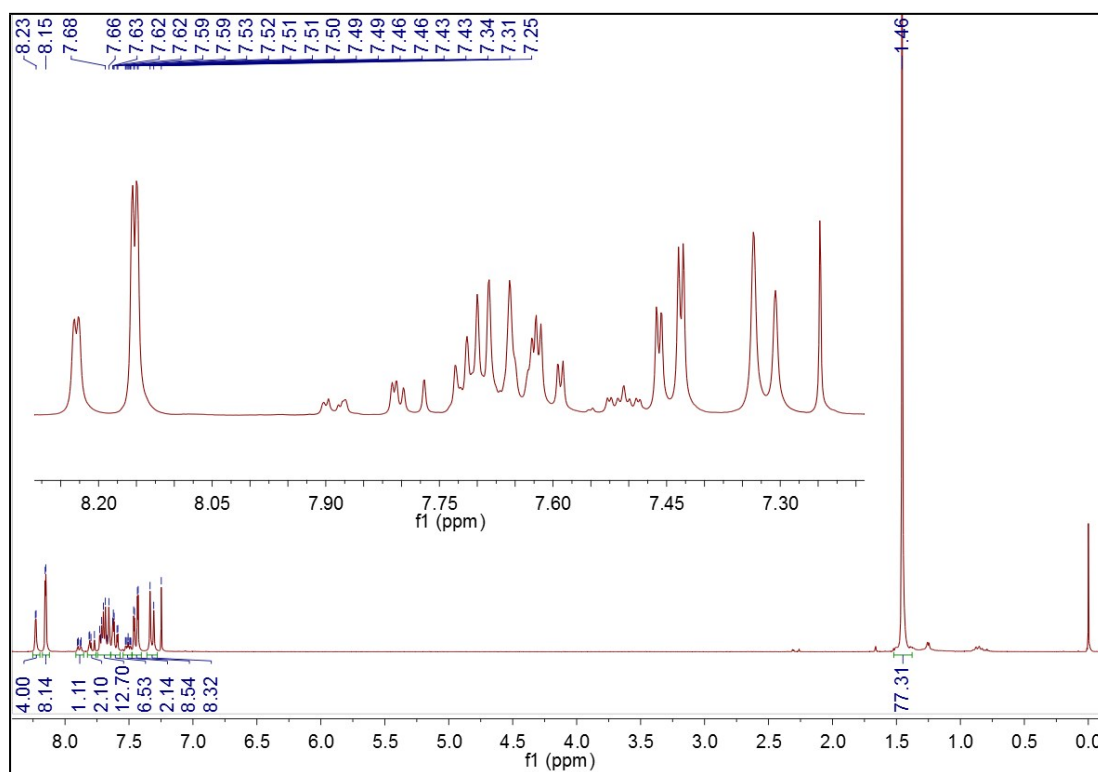

Figure S10.  $^1\text{H}$  NMR spectrum of b2

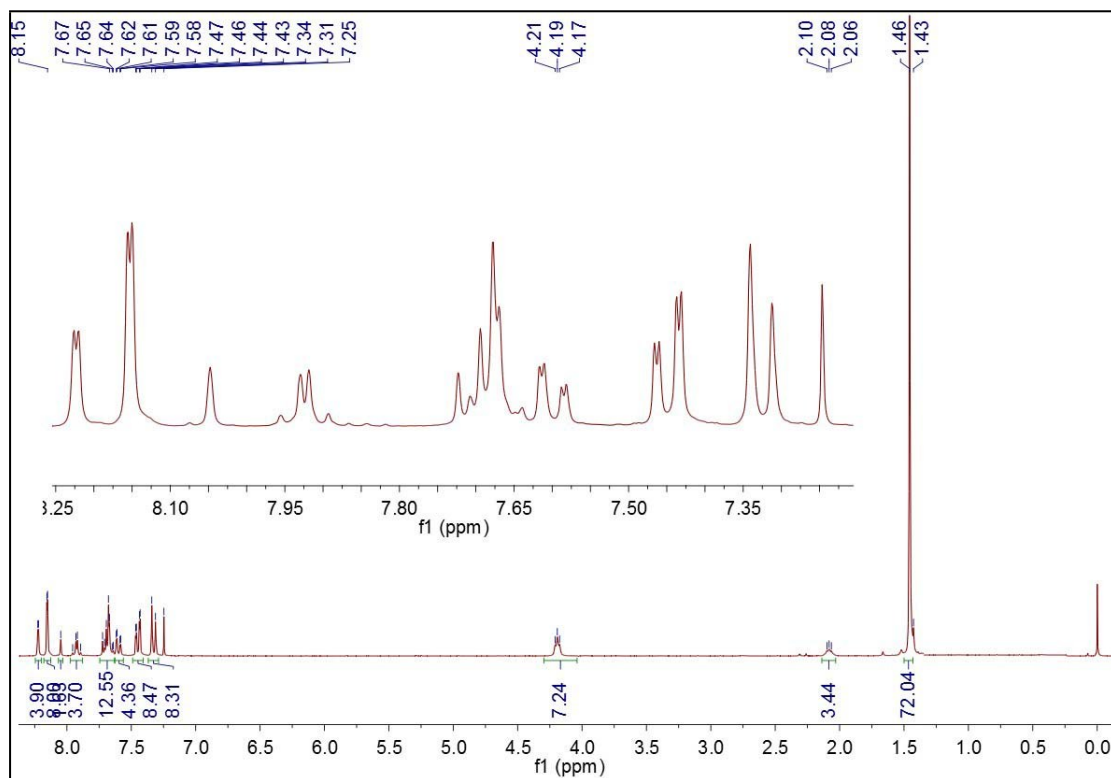

Figure S11.  $^1\text{H}$  NMR spectrum of c1

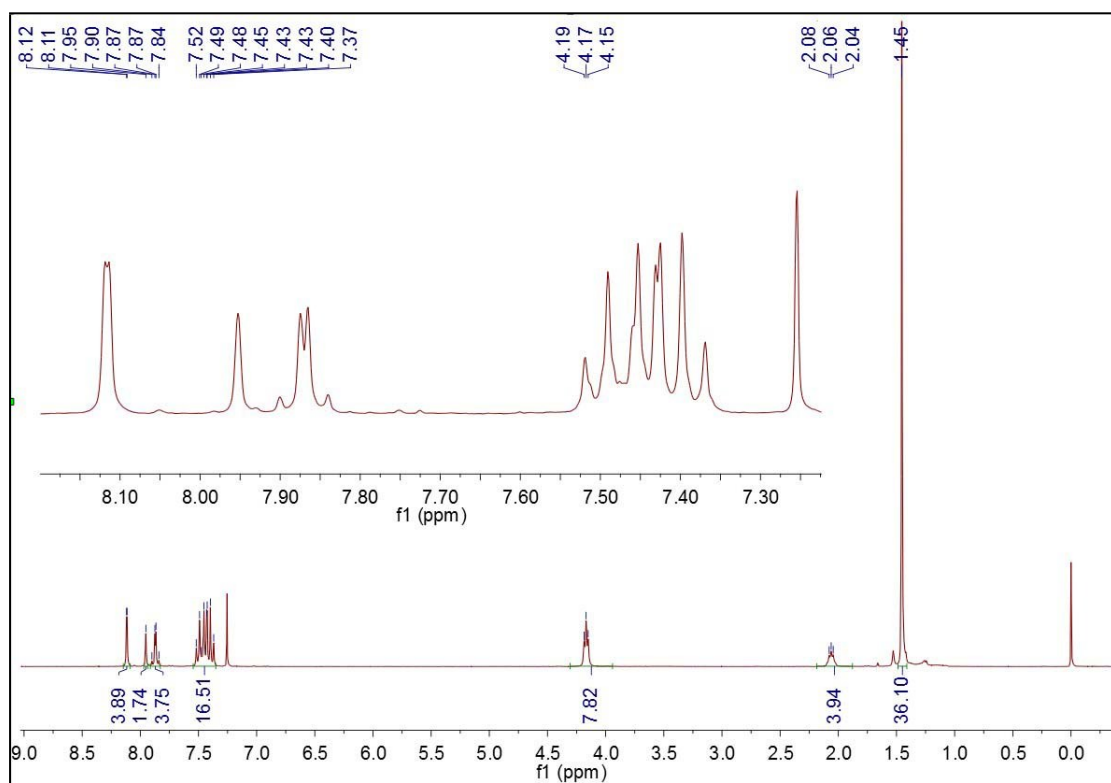

Figure S12.  $^1\text{H}$  NMR spectrum of c2



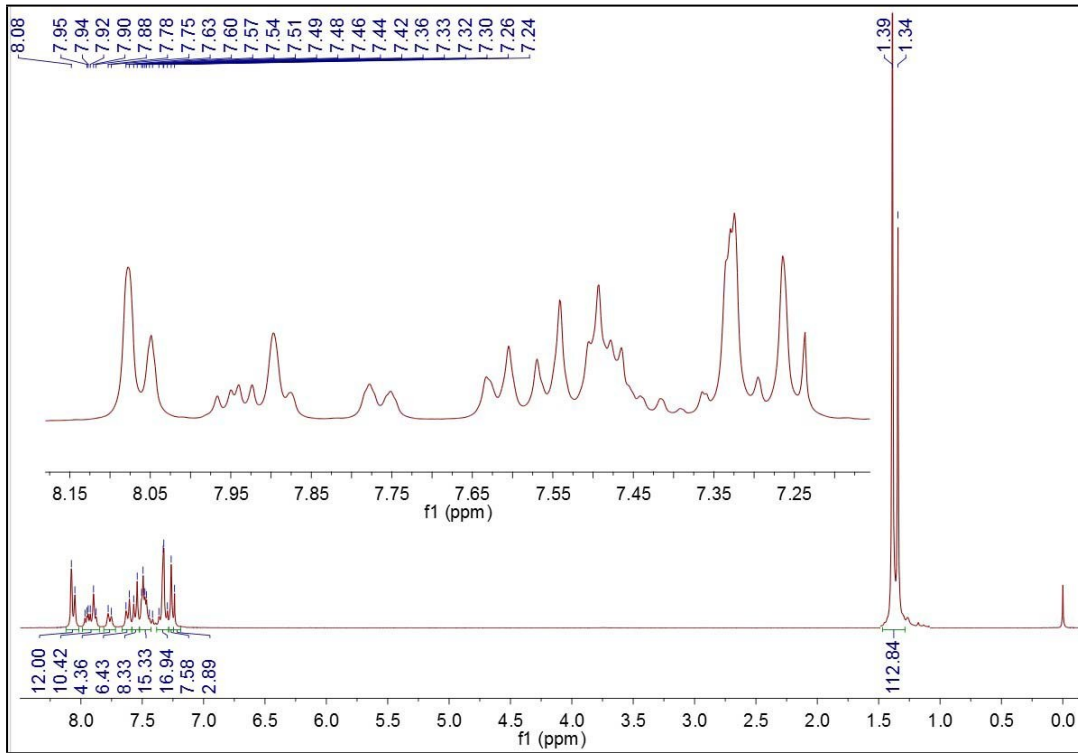

Figure S13. <sup>1</sup>H NMR spectrum of TFPC1

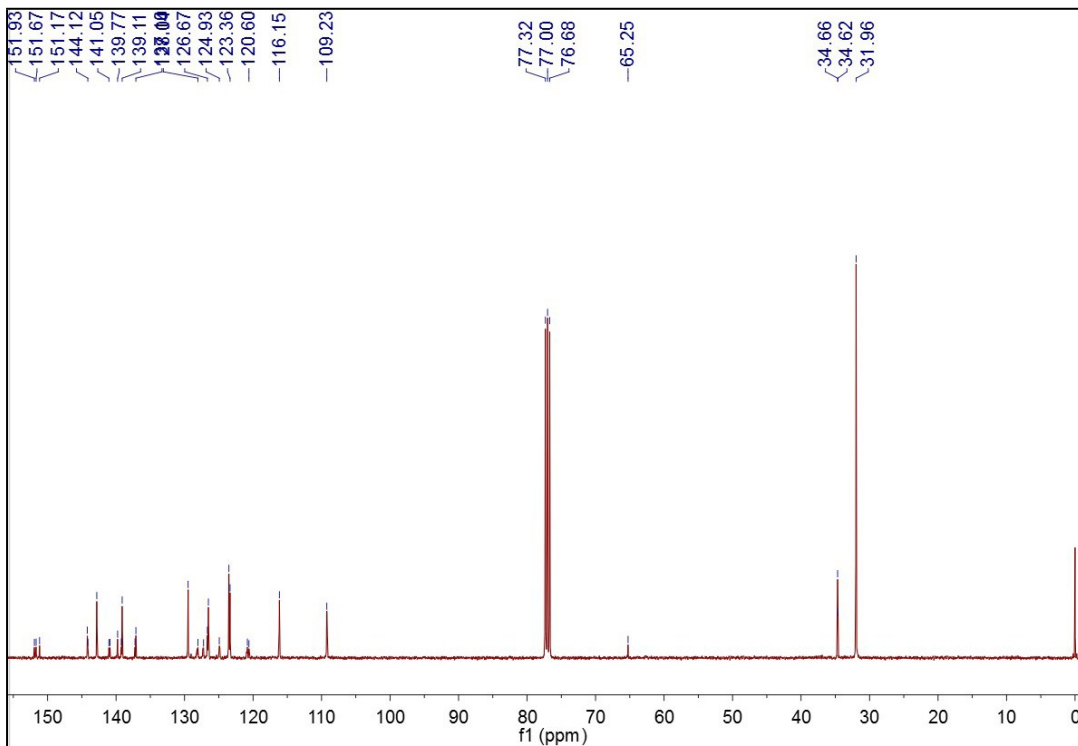

Figure S14. <sup>13</sup>C NMR spectrum of TFPC1

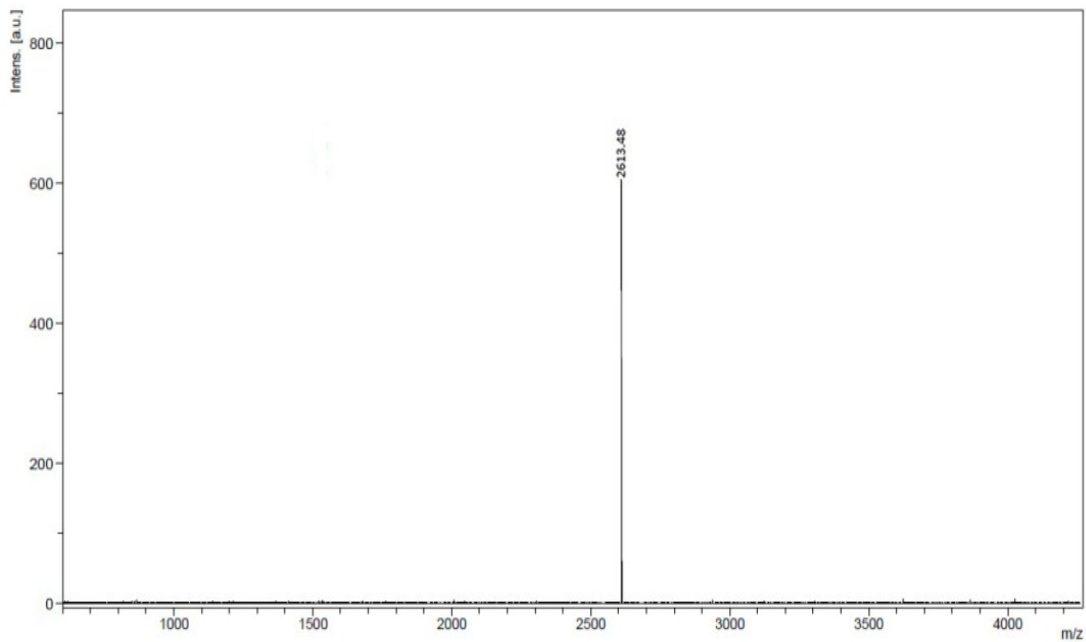

**Figure S15.** MALDI Mass spectrum of TFPC1

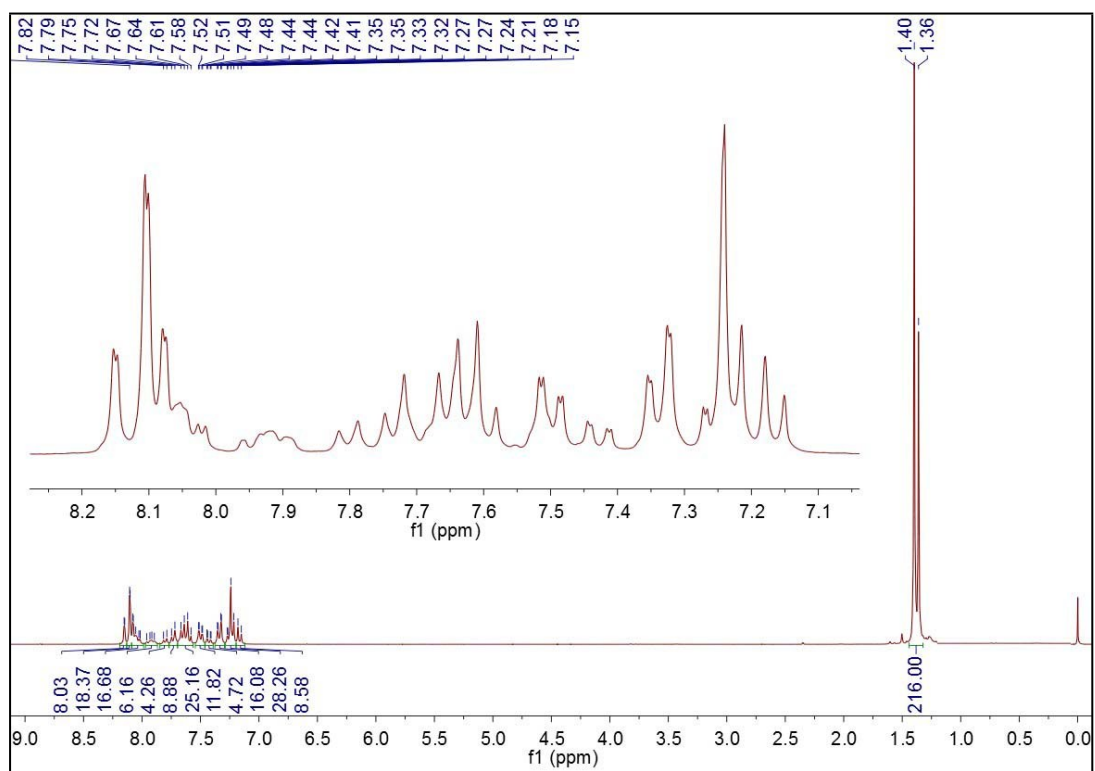

**Figure S16.** <sup>1</sup>H NMR spectrum of TFPC2

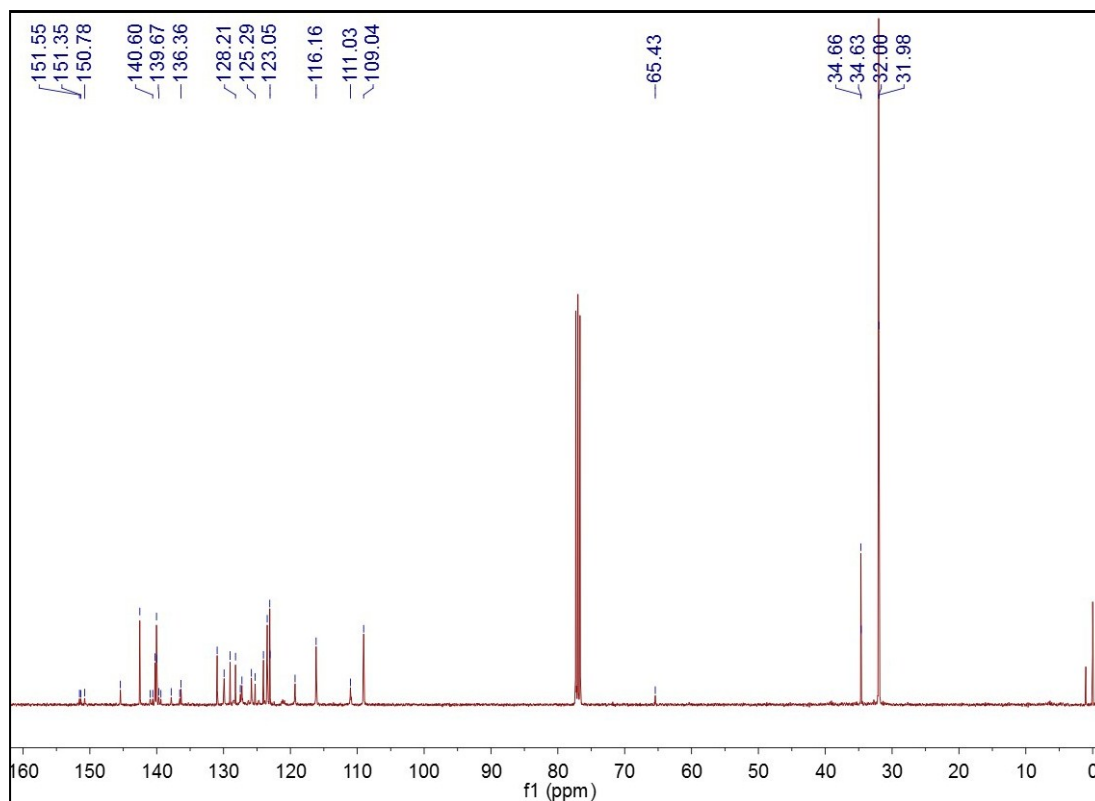

**Figure S17.**  $^{13}\text{C}$  NMR spectrum of TFPC2

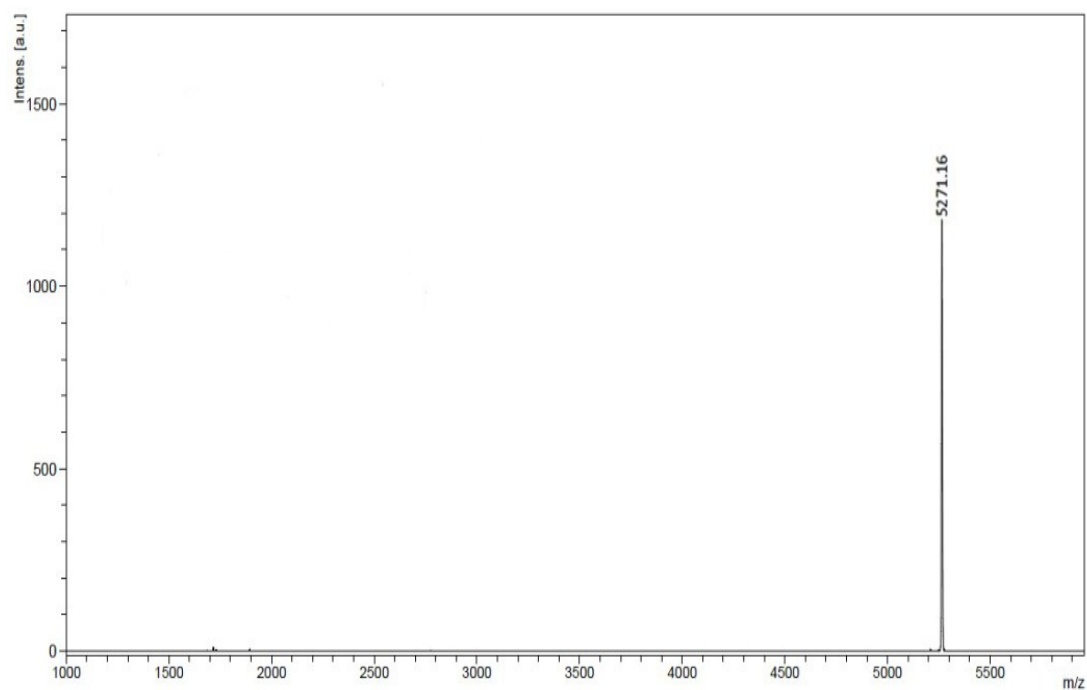

**Figure S18.** MALDI Mass spectrum of TFPC2
